# Supplementary material for: OMERACT agreement and reliability study of ultrasonographic elementary lesions in osteoarthritis of the foot
Source: PubMed Central journal article supplement — RMD Open. 2019 Mar 8;5(1):e000795. doi: 10.1136/rmdopen-2018-000795 (PMC6443136; doi:10.1136/rmdopen-2018-000795), 2019-03-08
Supplement: rmdopen-2018-000795supp003.pdf [file rmdopen-2018-000795supp003.pdf]

|               | Search Strategy                                                                                                                                                                                                                                                                                                                                                                                                                                                                                                                                                                                                                                                                                                                                                                                                                                                                                                                                                                                                                                                                            |
|---------------|--------------------------------------------------------------------------------------------------------------------------------------------------------------------------------------------------------------------------------------------------------------------------------------------------------------------------------------------------------------------------------------------------------------------------------------------------------------------------------------------------------------------------------------------------------------------------------------------------------------------------------------------------------------------------------------------------------------------------------------------------------------------------------------------------------------------------------------------------------------------------------------------------------------------------------------------------------------------------------------------------------------------------------------------------------------------------------------------|
| <b>PubMed</b> | <p>#1 foot [all fields]<br/>           #2 ankle joint[Mesh]<br/>           #3 ankle[all fields]<br/>           #4 metatarsophalangeal joint[all fields]<br/>           #5 forefoot, human [Mesh]<br/>           #6 forefoot [all fields]<br/>           #7 midfoot [all fields]<br/>           #8 rearfoot [all fields]<br/>           #9 OR 1-8<br/>           #10 osteoarthritis[Mesh]<br/>           #11 osteoarthrosis [all fields]<br/>           #12 osteophyte [all fields]<br/>           #13 joint space narrowing [all fields]<br/>           #14 degenerative joint disease*[all fields]<br/>           #15 OR 10-14<br/>           #16 9 AND 15<br/>           #17 Ultrasonography[Mesh]<br/>           #18 Ultrason*[All fields]<br/>           #19 Ultrasound [all fields]<br/>           #20 Sonograph*[all fields]<br/>           #21 Ecograph*[all fields]<br/>           #22 Echotomograph*[all fields]<br/>           #23 ultrasonograph*[all fields]<br/>           #24 OR 17-23<br/>           #25 16 AND 24<br/>           #26 25 AND Limit to Humans and Adults</p> |
| <b>Embase</b> | <p>#1 foot/exp OR foot<br/>           #2 ankle/exp OR ankle<br/>           #3 metatarsophalangeal joint/exp OR metatarsophalangeal joint<br/>           #4 forefoot/exp OR forefoot<br/>           #5 midfoot<br/>           #6 1-5 or<br/>           #7 osteoarthritis/exp OR osteoarthritis<br/>           #8 osteoarthrosis/exp OR osteoarthrosis<br/>           #9 osteophyte/exp OR osteophyte<br/>           #10 joint/exp OR joint AND (space/exp OR space) AND narrowing<br/>           #11 degenerative AND (joint/exp OR joint) AND (disease/exp OR disease)<br/>           #12 OR 7-11<br/>           #13 6 AND 12<br/>           #14 echography/exp OR echography<br/>           #15 ultrasonograph*<br/>           #16 ultrasound<br/>           #17 14 OR 15 OR 16<br/>           #18 13 AND 17<br/>           # 19 18 AND Limit to Humans, Adults, Articles and Embase</p>                                                                                                                                                                                                  |

**Table S1** Search strategies of the Systematic Literature Review
