# Supplementary material for: OMERACT agreement and reliability study of ultrasonographic elementary lesions in osteoarthritis of the foot
Source: PubMed Central journal article supplement — RMD Open. 2019 Mar 8;5(1):e000795. doi: 10.1136/rmdopen-2018-000795 (PMC6443136; doi:10.1136/rmdopen-2018-000795), 2019-03-08
Supplement: rmdopen-2018-000795supp004.pdf [file rmdopen-2018-000795supp004.pdf]

| Study                         | Study design  | Inclusion criteria                                                                                                                                | Exclusion criteria       | Joints                                                                  | Lesions                             | Definitions                                                                                                                      | Scans         |
|-------------------------------|---------------|---------------------------------------------------------------------------------------------------------------------------------------------------|--------------------------|-------------------------------------------------------------------------|-------------------------------------|----------------------------------------------------------------------------------------------------------------------------------|---------------|
| Drakonaki E 2011 <sup>1</sup> | retrospective | patients with midfoot joints degenerative changes referred to the radiology department for US examination and US-guided intra-articular injection | inflammatory arthropathy | Tarsometatarsal<br>Calcaneocuboid<br>Naviculocuneiform<br>Talonavicular | Osteophytes<br>Synovial hypertrophy | <b>Osteophytes:</b> definite bone irregularity<br><b>Synovial hypertrophy:</b> synovial thickening with increased Doppler signal | Not described |
