# Supplementary material for: OMERACT agreement and reliability study of ultrasonographic elementary lesions in osteoarthritis of the foot
Source: PubMed Central journal article supplement — RMD Open. 2019 Mar 8;5(1):e000795. doi: 10.1136/rmdopen-2018-000795 (PMC6443136; doi:10.1136/rmdopen-2018-000795), 2019-03-08
Supplement: rmdopen-2018-000795supp005.pdf [file rmdopen-2018-000795supp005.pdf]

| <b>Elementary lesions in foot osteoarthritis</b>                                                                 | <b>First Round Agreement</b> |
|------------------------------------------------------------------------------------------------------------------|------------------------------|
| Midfoot joints must be assessed separately for structural and inflammatory abnormalities in foot OA              | 84.2%                        |
| I MTP joint must be assessed separately for structural and inflammatory abnormalities in foot OA                 | 100.0%                       |
| II to V MTP joints must be assessed together (globally) for structural and inflammatory abnormalities in foot OA | 50.0%                        |
| Joint inflammation and structural changes must be assessed separately in foot OA                                 | 94.7%                        |
| Joint synovial hypertrophy (with or without Doppler signal) should always be assessed in foot OA                 | 100.0%                       |
| Joint effusion should always be assessed in foot OA                                                              | 89.5%                        |
| Synovial hypertrophy can be scored semi-quantitatively from 0 to 3 (i.e. 0= no; 1= mild; 2= moderate; 3= severe) | 84.2%                        |
| Doppler can be scored semi-quantitatively from 0 to 3 (i.e. 0= no; 1= mild; 2= moderate; 3= severe)              | 89.5%                        |
| Joint effusion can be scored semi-quantitatively from 0 to 3 (i.e. 0= no; 1= mild; 2= moderate; 3= severe)       | 72.2%                        |
| Synovial hypertrophy can also be scored dichotomously (i.e. 0=absent; 1=present)                                 | 78.9%                        |
| Doppler can also be scored dichotomously (i.e. 0=absent; 1=present)                                              | 63.2%                        |
| Joint effusion can also be scored dichotomously (i.e. 0=absent; 1=present)                                       | 68.4%                        |
| Osteophytes should always be assessed for joint structural changes in foot OA                                    | 100.0%                       |
| Osteophytes can be scored semi-quantitatively from 0 to 3 (i.e. 0= no; 1= mild; 2= moderate; 3= severe)          | 73.7%                        |
| Cartilage damage of the first metatarsal head should always be assessed for joint structural changes in foot OA  | 78.9%                        |

Table S3 – First Delphi round agreement
