# Supplementary material for: OMERACT agreement and reliability study of ultrasonographic elementary lesions in osteoarthritis of the foot
Source: PubMed Central journal article supplement — RMD Open. 2019 Mar 8;5(1):e000795. doi: 10.1136/rmdopen-2018-000795 (PMC6443136; doi:10.1136/rmdopen-2018-000795), 2019-03-08
Supplement: rmdopen-2018-000795supp006.pdf [file rmdopen-2018-000795supp006.pdf]

| <b>Elementary lesions in foot osteoarthritis</b>                                                                                                              | <b>Second Round Agreement</b> | <b>Third Round Agreement</b> |
|---------------------------------------------------------------------------------------------------------------------------------------------------------------|-------------------------------|------------------------------|
| II to V MTP joints must be assessed separately for structural and inflammatory abnormalities in foot OA                                                       | 73.7%                         | 94.7%                        |
| Joint effusion should be scored together with synovial hypertrophy according to a semi-quantitative, 0-3, score (i.e. 0= no; 1= mild; 2= moderate; 3= severe) | 57.9%                         |                              |
| Joint effusion, synovial hypertrophy and Doppler can also be scored dichotomously (i.e. 0=absent; 1=present)                                                  | 63.2%                         |                              |
| Osteophytes should only be scored dichotomously (i.e. 0=absent; 1=present)                                                                                    | 73.7%                         |                              |
| Effusion in foot OA should be assessed with                                                                                                                   | dichotomous                   | 33.3%                        |
|                                                                                                                                                               | semi-quantitative             | 66.7%                        |
|                                                                                                                                                               | quantitative                  | 0%                           |
| Osteophytes in foot OA should be assessed with                                                                                                                | dichotomous                   | 36.8%                        |
|                                                                                                                                                               | semi-quantitative             | 52.6%                        |
|                                                                                                                                                               | quantitative                  | 10.5%                        |

Table S4 - Second and third Delphi round agreement
