# Supplementary material for: OMERACT agreement and reliability study of ultrasonographic elementary lesions in osteoarthritis of the foot
Source: PubMed Central journal article supplement — RMD Open. 2019 Mar 8;5(1):e000795. doi: 10.1136/rmdopen-2018-000795 (PMC6443136; doi:10.1136/rmdopen-2018-000795), 2019-03-08
Supplement: rmdopen-2018-000795supp007.pdf [file rmdopen-2018-000795supp007.pdf]



*Table S5.* Intra and inter-observer results of the live, patient-based, exercise on the MTP joints. Strength of agreement: < 0.20 poor, 0.21–0.40 fair, 0.41–0.60 moderate, 0.61–0.80 good, 0.81–1.00 excellent.
