# Supplementary figures and images for: OMERACT agreement and reliability study of ultrasonographic elementary lesions in osteoarthritis of the foot
Source: PubMed Central journal article supplement — RMD Open. 2019 Mar 8;5(1):e000795. doi: 10.1136/rmdopen-2018-000795 (PMC6443136; doi:10.1136/rmdopen-2018-000795), 2019-03-08

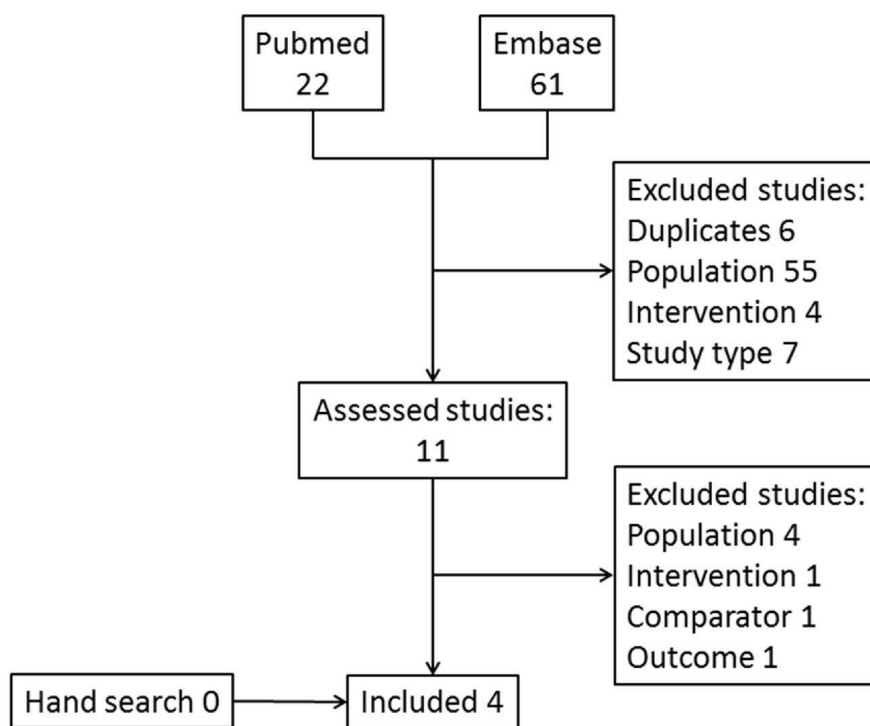

Supplement: rmdopen-2018-000795supp001.pdf [file rmdopen-2018-000795supp001.pdf]

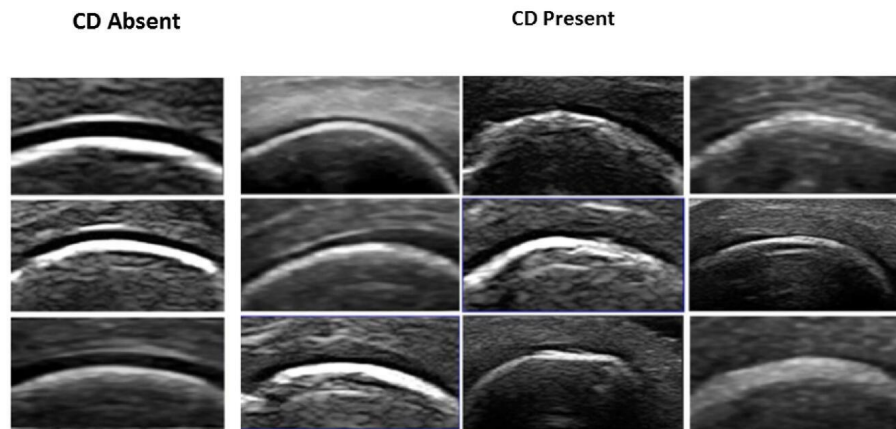

Supplement: rmdopen-2018-000795supp002.pdf [file rmdopen-2018-000795supp002.pdf]
